# Supplementary material for: A fluorescence-based high-throughput screening method for determining the activity of diguanylate cyclases and c-di-GMP phosphodiesterases
Source: Royal Society of Chemistry journal article supplement (doi:10.1039/d0ra02540b), 2020-01-01
Supplement: d0ra02540b1.pdf [file d0ra02540b1.pdf]

## A fluorescence-based high-throughput screening method for determining activity of diguanylate cyclases and c-di-GMP phosphodiesterases

Zi-Qiang Wang,<sup>‡a</sup> Teng-Fei Xuan,<sup>‡a</sup> Jun Liu,<sup>a</sup> Wei-Min Chen,<sup>\*a</sup> and Jing Lin<sup>\*a</sup>

<sup>a</sup>College of Pharmacy, Jinan University, Guangzhou 510632, P. R. China.

<sup>‡</sup>Z. Q. W. and T. F. X. equally contributed to this work.

\*Corresponding authors *email*: [linjing\\_jnu@163.com](mailto:linjing_jnu@163.com); [twmchen@jnu.edu.cn](mailto:twmchen@jnu.edu.cn)

**Table 1: Gene construction of WspR and RocR expression plasmids.**

| Name | Sequence (5'-3') <sup>a</sup>                                                                                                                                                                                                                                                                                                                                                                                                                                                                                                                                                                                                                                                                                                                                                                                                                                                                                                                                                                                                                                                                                                                                |
|------|--------------------------------------------------------------------------------------------------------------------------------------------------------------------------------------------------------------------------------------------------------------------------------------------------------------------------------------------------------------------------------------------------------------------------------------------------------------------------------------------------------------------------------------------------------------------------------------------------------------------------------------------------------------------------------------------------------------------------------------------------------------------------------------------------------------------------------------------------------------------------------------------------------------------------------------------------------------------------------------------------------------------------------------------------------------------------------------------------------------------------------------------------------------|
| WspR | CATATGCACAACCCTCATGAGAGCAAGACCGACCTGGGCGCCCCTCTGGACGGCGCGG<br>TCATGGTACTGCTTGTTCGATGATCAGGCCATGATCGGAGAGGCTGTGCGTCGCTCACTG<br>GCGAGCGAGGCGGGCATCGACTTCCATTTCTGTTCCGATCCGCAGCAGGCGGTGGCGGT<br>GGCCAACCAGATCAAGCCGACGGTGATCCTCCAGGACCTGGTGATGCCCCGGCGTCGAC<br>GGCCTCACGCTGCTCGCTGCCTACCGCGGCAACCCGGCGACCCGCGACATCCCGATCAT<br>CGTCCTGTCGACCAAGGAAGAGCCGACGGTGAAGAGCGCGGCGTTTCGCCGCCGGCGCC<br>AACGACTACCTGGTCAAGCTGCCGGACGCCATCGAGCTGGTGGCGCGGATCCGCTACCA<br>CTCGCGTTCGTACATCGCCCTGCAGCAACGCGACGAGGCCATCGGGCGCTGCGCGAGA<br>GCCAGCAGCAGTTGCTGGAGACCAACCTGGTGCTGCAGCGGCTGATGAACTCCGACGG<br>CCTGACCGGGCTCTCCAACCGTCGTCACCTCGACGAATACCTGGAGATGGAGTGGCGCC<br>GCTCGCTGCGCGAGCAGTCGCAACTGTCGCTGCTGATGATCGACGTGGACTATTTCAAG<br>AGCTACAACGACACCTTCGGCCACGTCGCCGGCGACGAGGCCCTGCGCCAGGTCGCCG<br>GGGCCATCCGCGAGGGCTGCAGTCGCTCCTCGGACCTGGCGGCTCGGTACGGCGGCGA<br>GGAGTTCGCCATGGTCTCCCGGGCACCTCGCCGGGCGGCGCACGGTTGCTGGCGGAGA<br>AGGTCCGGCGCACGGTGGAGAGCCTGCAGATCAGCCACGACCAGCCACGCCCGGGCTC<br>GCACCTGACCGTCAGCATCGGCGTCAGCACCTGGTGCCGGGCGGCGGGGCAAACC<br>TTCCGGGTTCATCGAGATGGCCGACCAGGCGCTCTACCAGCCAAGAACAATGGCCG<br>CAACCAGGTGGGCCTGATGGAACAGCCGGTGCCGCCGGCCCCGGCGGGCTGAGAATTC |
| RocR | CATATGAATGATTTGAATGTTCTGGTGTGGAGGATGAGCCTTTTCAGCGCCTGGTAGC<br>CGTCACAGCCCTGAAGAAAGTGGTGCCCGGATCGATCCTCGAGGCGGGACGGCAAG<br>GAGGCGGTGGCGATCCTGGAGTCCTGCGGACACGTCGACATCGCCATCTGCGACCTGCA<br>GATGAGCGGCATGGACGGCCTGGCGTTCCTTCGCCACGCAAGCCTGAGCGGCAAGGTC<br>CATTCGGTGATCCTCAGCAGCGAGGTGGATCCCATCCTGCGCCAGGCCACCATTTTCGAT<br>GATCGAGTGCCTGGGCCTCAATTTTCTCGGCGACCTCGGCAAGCCATTCAGCCTGGAGC<br>GGATCACCGCCCTGTTGACCCGCTACAACGCTCGTCGCCAGGACCTTCGCGACAGATC<br>GAAGTCGCCGAGCTGCCCTCCGTGGCGGACGTGGTGCGCGGCCTCGACAATGGCGAGTT<br>CGAAGCCTACTACCAGCCCAAGGTGGCCCTGGATGGCGGCGGCCTGATCGGCGCCGAG<br>GTCTGGCACGCTGGAACCACCCGCATCTCGGCGTATTGCCGCCGTCGATTTCTCTAT<br>GTGATGAAAACCTACAACCTGGTCGACAAGCTGTTCTGGCAACTGTTTCAGCCAGGGGCT<br>GGCGACGCGCAGGAAGCTGGCGCAGTTGGGGCAGCCGATCAACCTGGCGTTCAACGTC                                                                                                                                                                                                                                                                                                                                                                                     |

|                                                                                                                                                                                                                                                                                                                                                                                                                                                                                                                                  |
|----------------------------------------------------------------------------------------------------------------------------------------------------------------------------------------------------------------------------------------------------------------------------------------------------------------------------------------------------------------------------------------------------------------------------------------------------------------------------------------------------------------------------------|
| CATCCTTCGCAACTGGGTTCGCGTGCCCTGGCCGAGAACATCTCGGCGTTGCTGACCGA<br>GTTCCACCTGCCGCCAGTTCGGTGATGTTTCGAGATCACCGAGACCGGGTTGATCAGCG<br>CTCCTGCCAGCAGCCTGGAGAACCTCGTGCCTGCGGATCATGGGCTGCGGCCTGGCG<br>ATGGACGATTCGGCGCCGGCTATTCGTCCCTCGACCGGCTCTGCGAGTTTCCCTTCAGC<br>CAGATCAAGCTGGACAGAACCTTCGTCCAGAAGATGAAGACCCAGCCAGGAGTTGCG<br>CCGTCATCAGCAGTGTCTGTGGCGTTGGCGCAGGCGCTGGGAATTTCCCTGGTGGTGGAA<br>GGGGTGGAGAGCGACGAACAACGGGTACGCCTGATCGAACTCGGTTGCTCCATAGCCC<br>AGGGCTATCTGTTCGCCC GGCCGATGCCGGAACAGCACTTCTCGACTATTGCTCCGGA<br>TCCTGAGAATTC |
|----------------------------------------------------------------------------------------------------------------------------------------------------------------------------------------------------------------------------------------------------------------------------------------------------------------------------------------------------------------------------------------------------------------------------------------------------------------------------------------------------------------------------------|

<sup>a</sup> The restriction sites at both ends of the gene are 5'-NdeI and 3'- EcoRI respectively.

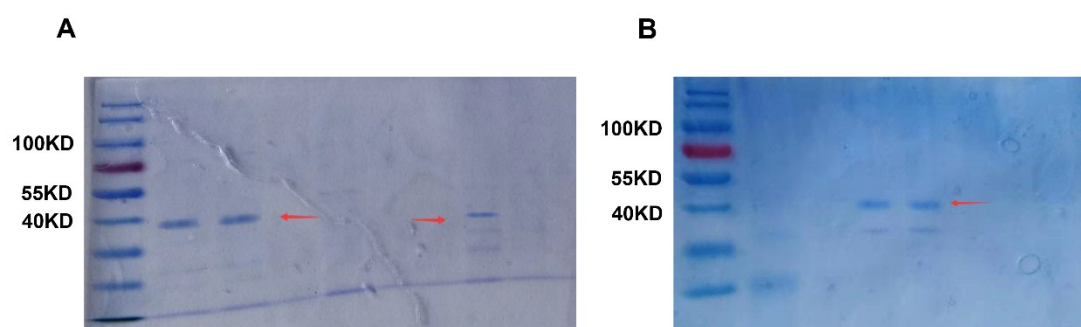

**Figure S1.** SDS-PAGE results of purified (A) WspR and (B) RocR enzymes. The experiments were run at a working voltage of 130 V for 1.2 h.

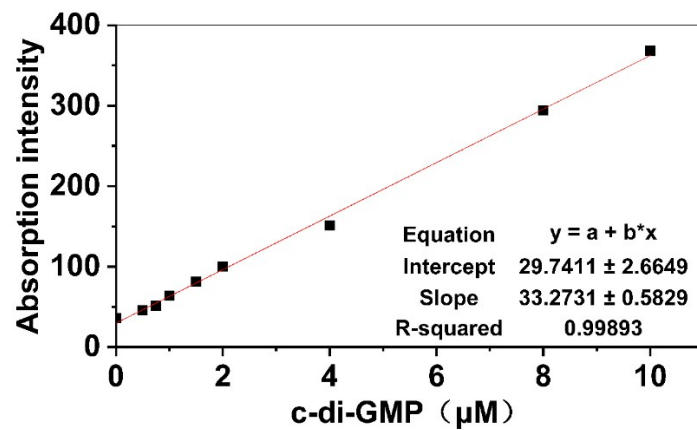

**Figure S2.** The relationship between the fluorescence intensity detected at the fifth hour and the corresponding c-di-GMP concentration. Detected by fluorescence spectrophotometer. [A18] = 2.5 µM, buffer B: 10 mM Tris-HCl, 2 mM MgCl<sub>2</sub>, 1 M KCl pH 7.5. Ex. 485 nm, Em. 500-700 nm. Incubation by improved method. Incubation temperature: -20°C. Incubation time: 12 hours.

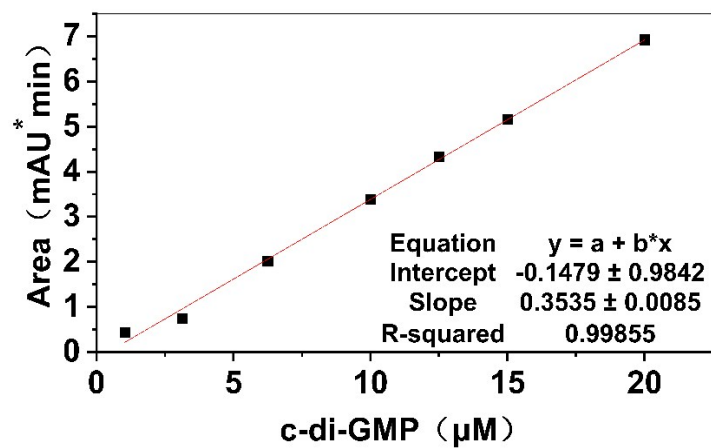

**Figure S3.** HPLC Peak areas corresponding to different concentrations of c-di-GMP standard solution. Detection wavelength was 252 nm, and HPLC conditions: A: 100 mM TEAA, B: CH<sub>3</sub>CN, B%: 2-2 %/ 3 min, 2-10 %/ 15 min, 10-30 %/ 25 min, 30-100 %/ 30 min.
